# Supplementary material for: Titania-coated gold nanorods as an effective carrier for gambogic acid
Source: Royal Society of Chemistry journal article supplement (doi:10.1039/c7ra08560e), 2017-01-01
Supplement: c7ra08560e1.pdf [file c7ra08560e1.pdf]

## Supporting Information

### Titania-Coated Gold Nanorods as An Effective Carrier for Gambogic Acid

Hong-Ye Wan,<sup>a</sup> Jian-Li Chen,<sup>a</sup> Xiao-Yan Yu<sup>a</sup> and Xiao-Ming Zhu<sup>a,\*</sup>

<sup>a</sup>State Key Laboratory of Quality Research in Chinese Medicine, Macau Institute for Applied Research in Medicine and Health, Macau University of Science and Technology, Taipa, Macau, China.

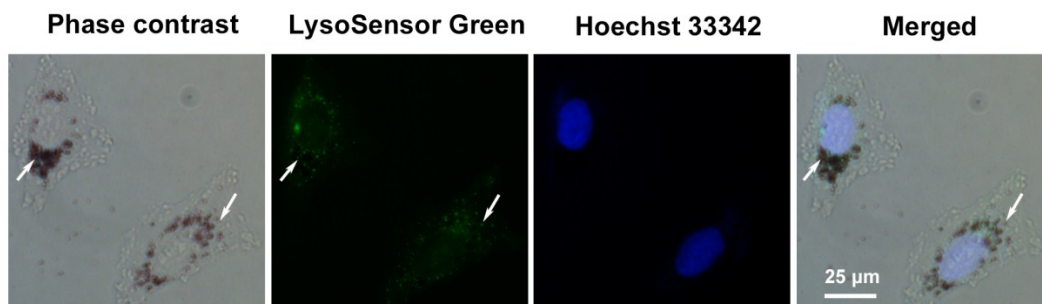

**Fig. S1** Intracellular localization of GNR/TiO<sub>2</sub> nanostructures. U-87 MG cells were incubated with 10  $\mu\text{g Au mL}^{-1}$  GNR/TiO<sub>2</sub> for 24 h. Cells were subsequently stained with 1  $\mu\text{M}$  LysoSensor™ Green DND-189 (green fluorescent dye for endosomes/lysosomes) and 100 ng  $\text{mL}^{-1}$  Hoechst 33342 (blue fluorescent dye for nuclei) for 30 min, and then observed by the fluorescent microscope.
